# Supplementary material for: Biallelic variants in HMGCS1 are a novel cause of rare rigid spine syndrome
Source: bioRxiv or medRxiv preprint supplement (doi:10.1101/2023.10.25.23297129), 2023-10-28
Supplement: Supplementary file [file media-1.pdf]

# **Supplementary**

## **Clinical summaries**

Clinical summaries for each case are available upon request.

**Supplementary Table 1 Summary of the biallelic variants in *HMGCS1* identified in the *HMGCS1*-myopathy cohort**

| Family | Consanguineous | Variant (NM_001098272.2)            | ClinVar Accession # | gnomAD                   | CADD    | PolyPhen-2           | Provean        | SIFT         |
|--------|----------------|-------------------------------------|---------------------|--------------------------|---------|----------------------|----------------|--------------|
| SPA1   | N*             | A, B. c.1339T>C, p.(Ser447Pro)[Hom] | SCV004036160        | Absent                   | 23.3    | Benign               | Neutral        | Tolerated    |
| JPN1   | N              | A. c.86A>T, p.(Gln29Leu)            | SCV004036161        | A. Absent                | A. 23.1 | A. Benign            | A. Deleterious | A. Tolerated |
|        |                | B. c.344_345del, p.(Ser115Trpfs*12) | SCV004036162        | B. Absent                |         |                      |                |              |
| ITA1   | N              | A. c.1289G>A (p.Arg430Lys)          | SCV004036163        | A. Absent                | A. 26.1 | A. Possibly damaging | A. Deleterious | A. Damaging  |
|        |                | B. c.890G>T (p.Gly297Val)           | SCV004036164        | B. Absent                | B. 23.7 | B. Possibly damaging | B. Deleterious | B. Tolerated |
| USA1   | N              | A. c.803G>C, p.(Cys268Ser)          | SCV004036165        | A. $1.59 \times 10^{-5}$ | A. 27.7 | A. probably damaging | A. Deleterious | A. Tolerated |
|        |                | B. c.209T>C, p.(Met70Thr)           | SCV004036166        | B. Absent                | B. 23.9 | B. Benign            | B. Deleterious | B. Damaging  |
| USA2   | N              | A. c.209T>C, p.(Met70Thr)           | SCV004036166        | A. Absent                | A. 23.9 | A. Benign            | A. Deleterious | A. Damaging  |
|        |                | B. no second variant detected       |                     |                          |         |                      |                |              |

<sup>A</sup>First allele.

<sup>B</sup>Second allele.

\*Parents were from a small village. Consanguinity suspected but denied.
